# Supplementary material for: Automated Real-Time Collection of Pathogen-Specific Diagnostic Data: Syndromic Infectious Disease Epidemiology
Source: PubMed Central journal article supplement (PMC6054708; doi:10.2196/publichealth.9876), 2018-07-06
Supplement: publichealth_v4i3e59_app1.pdf [file publichealth_v4i3e59_app1.pdf]

## **Multimedia Appendix 1: BioFire Syndromic Trends System**

### **System and Data Output**

The BioFire® FilmArray® System performs nucleic acid purification, reverse transcription, nested multiplex Polymerase Chain Reaction amplification and DNA melt curve analysis for up to 30 targets in 63 minutes ([32], [www.biofire.com](http://www.biofire.com)). The FilmArray disposable pouch is prepared by injecting hydration solution and, separately, the patient sample, i.e., for the FilmArray RP test, a nasopharyngeal swab in viral transport media. The pouch is loaded into the FilmArray Instrument and the operator scans the barcode (containing panel type, lot and serial numbers) and then scans or manually enters information into the “Sample” field. Additional free form text can be entered into a “Tag” field. Software on the computer connected to the FilmArray Instrument analyses the amplification products and indicates each pathogen target detected. The results are presented as a Portable Document Format report and can be exported to the laboratory’s LIS. Information about the patient (gender, age, date of birth etc.) is not recorded by the instrument unless specifically entered.

As of 2016, more than 4,000 FilmArray instruments have been placed in clinical use worldwide. Approximately 80% of these systems are in the US. The FilmArray RP test is United States Food and Drug Administration designated as Clinical Laboratory Improvement Act (CLIA) moderate status (can be used in moderate to high complexity laboratories).

### **Syndromic Trends Client Software and Database**

The Trend client software resides on the computer associated with the FilmArray Instrument(s). The computer makes a secure, Hypertext Transfer Protocol Secure connection to services hosted by Amazon Web Services. Authenticated data submissions are stored in a database hosted by Amazon Relational Database Service. Both services have been configured to be HIPAA Security Rule compliant [80]. Trend client software requires that the computer has Internet access to make secure outbound web requests. The connection protocol is industry standard technology used for secure banking and web applications. The Website software authenticates the Trend data before saving the exported de-identified data to the Trend Database.

**Multimedia Appendix 1 Table: Clinical laboratories participating in the initial Trend study**

| HHS region <sup>a</sup> | Name                                                | City, State        | Hospital, Facility Type                   | Bed Count |
|-------------------------|-----------------------------------------------------|--------------------|-------------------------------------------|-----------|
| 1                       | University of Massachusetts Medical School-Baystate | Springfield, MA    | University Affiliated                     | 1,000     |
| 2                       | Albany Medical Center                               | Albany, NY         | Medical College Affiliated                | 800       |
| 2                       | Northwell Health                                    | Lake Success, NY   | Network                                   | 6,400     |
| 2                       | NYU Langone Health                                  | New York, NY       | Network                                   | 1,500     |
| 2                       | Stony Brook University Hospital                     | Stony Brook, NY    | University Affiliated                     | 600       |
| 2                       | Winthrop University Hospital                        | Mineola, NY        | University Affiliated                     | 600       |
| 4                       | Greenville Health System                            | Greenville, SC     | Network                                   | 1,400     |
| 4                       | Nicklaus Children's Hospital                        | Miami, FL          | Children's                                | 300       |
| 4                       | Medical University of South Carolina                | Charleston, SC     | University Affiliated                     | 700       |
| 5                       | South Bend Medical Foundation                       | South Bend, IN     | Commercial lab serving regional hospitals | NA        |
| 5                       | Detroit Medical Center                              | Detroit, MI        | Network                                   | 2,000     |
| 5                       | Nationwide Children's Hospital                      | Columbus, OH       | Children's                                | 600       |
| 7                       | Children's Mercy                                    | Kansas City, MO    | Children's                                | 400       |
| 7                       | Washington University Medical Center                | St. Louis, MO      | University Network                        | 1,700     |
| 7                       | Nebraska Medical Center                             | Omaha, NE          | University Network                        | 600       |
| 8                       | Children's Hospital Colorado                        | Denver, CO         | Children's Hospital                       | 500       |
| 8                       | Intermountain Medical Center                        | Salt Lake City, UT | University Affiliated                     | 500       |
| 8                       | Primary Children's Hospital                         | Salt Lake City, UT | Children's                                | 300       |
| 9                       | Children's Hospital of Los Angeles                  | Los Angeles, CA    | Children's, University Affiliated         | 500       |
| 9                       | UC San Diego Health                                 | San Diego, CA      | University Affiliated                     | 700       |

<sup>a</sup> The Health and Human Services (HHS) regions are as defined by the CDC (reference [4]).

## References

4. National Center for Immunization and Respiratory Diseases. National Respiratory and Enteric Virus Surveillance System (NREVSS). Centers for Disease Control and Prevention; 2017 [April 30, 2017] Available from: <http://www.cdc.gov/surveillance/nrevss/>. Archived at: <http://www.webcitation.org/6wY28o3ZP>.
32. Poritz MA, Blaschke AJ, Byington CL, Meyers L, Nilsson K, Jones DE, Thatcher SA, Robbins T, Lingenfelter B, Amriott E, Herbener A, Daly J, Dobrowolski SF, Teng DH, Ririe KM. FilmArray, an automated nested multiplex PCR system for multi-pathogen detection: development and application to respiratory tract infection. *PLoS One* 2011; 6(10):e26047
80. Amazon Web Services. Architecting for HIPAA Security and Compliance on Amazon Web Services. Amazon; 2017 [April 30, 2017] Available from: [https://d0.awsstatic.com/whitepapers/compliance/AWS\\_HIPAA\\_Compliance\\_Whitepaper.pdf](https://d0.awsstatic.com/whitepapers/compliance/AWS_HIPAA_Compliance_Whitepaper.pdf). Archived at: <http://www.webcitation.org/6wY36JCmV>.
