# Supplementary material for: Automated Real-Time Collection of Pathogen-Specific Diagnostic Data: Syndromic Infectious Disease Epidemiology
Source: PubMed Central journal article supplement (PMC6054708; doi:10.2196/publichealth.9876), 2018-07-06

## Multimedia Appendix 5: Detection of FilmArray RP Organisms by Year

Percent detection rates from all participating Trend sites for each FilmArray RP organism are broken out by respiratory year. Organisms are ordered by total abundance across the four years.

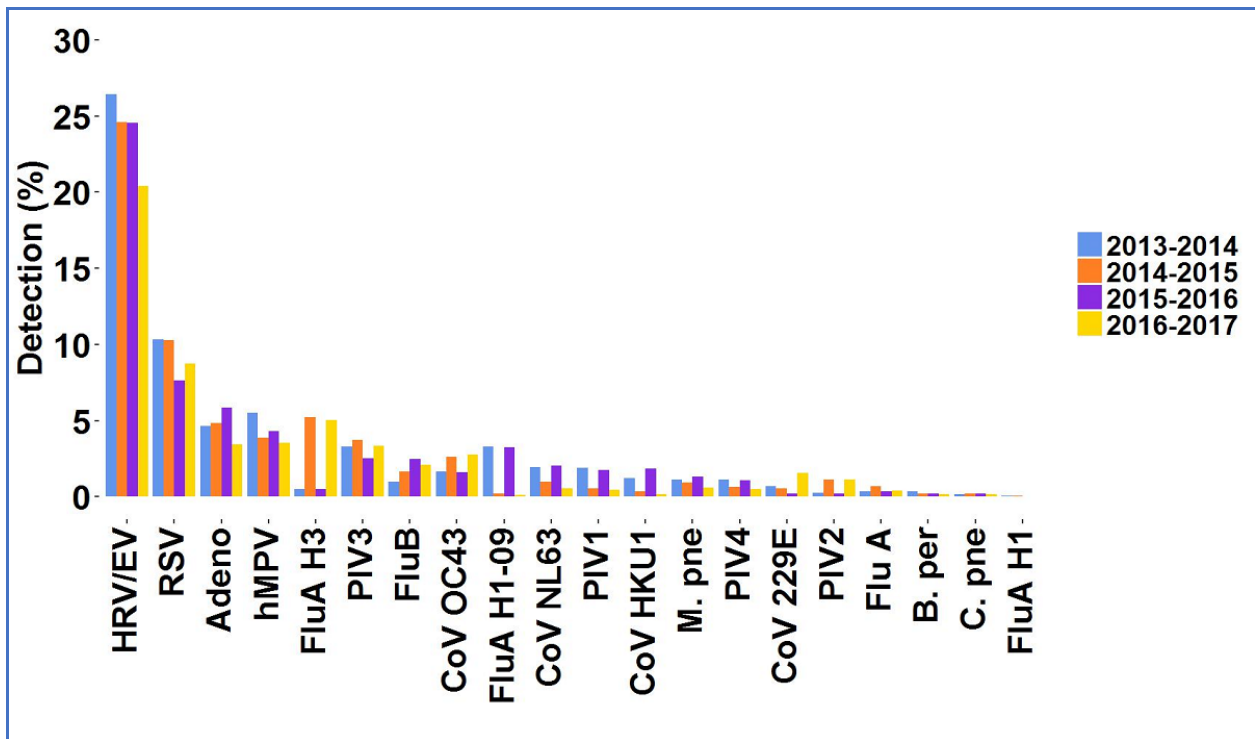

Supplement: publichealth_v4i3e59_app5.pdf [file publichealth_v4i3e59_app5.pdf]
