# Supplementary material for: Automated Real-Time Collection of Pathogen-Specific Diagnostic Data: Syndromic Infectious Disease Epidemiology
Source: PubMed Central journal article supplement (PMC6054708; doi:10.2196/publichealth.9876), 2018-07-06

## Multimedia Appendix 6: Detection of Adenovirus and the Three Bacteria

Detection of adenovirus and the three bacterial pathogens (*B. pertussis*, *C. pneumoniae*, and *M. pneumoniae*) in the Trend dataset displayed as a stacked area graph. CDC measured ILI, is indicated (orange line).

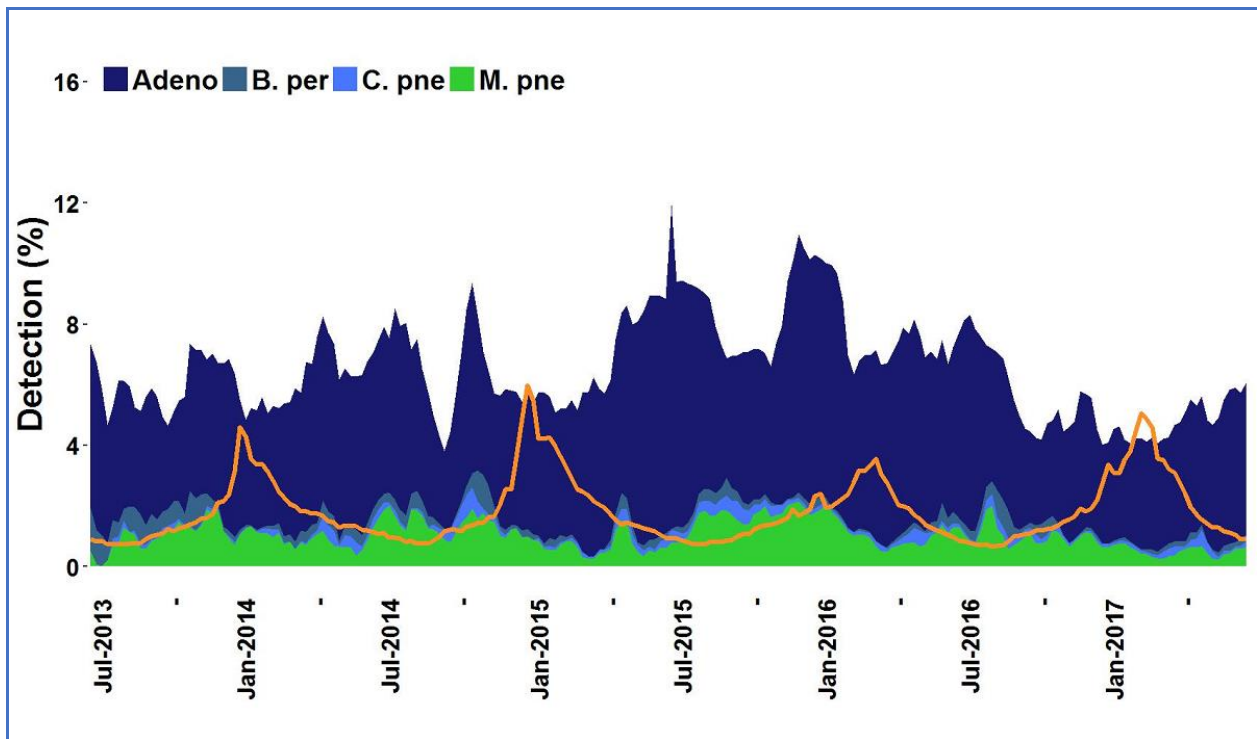

Supplement: publichealth_v4i3e59_app6.pdf [file publichealth_v4i3e59_app6.pdf]
