# Supplementary material for: Automated Real-Time Collection of Pathogen-Specific Diagnostic Data: Syndromic Infectious Disease Epidemiology
Source: PubMed Central journal article supplement (PMC6054708; doi:10.2196/publichealth.9876), 2018-07-06

## Multimedia Appendix 7: Linear Regression of MIE and Observed Codetections

The time series data from main text figure 5, second data view, shown as a scatter plot. The equation of the linear regression is:

$$\text{MIE} = 4.05153 * \text{Codetection rate} - 0.0206 \quad (R^2 \text{ value of } 0.9003).$$

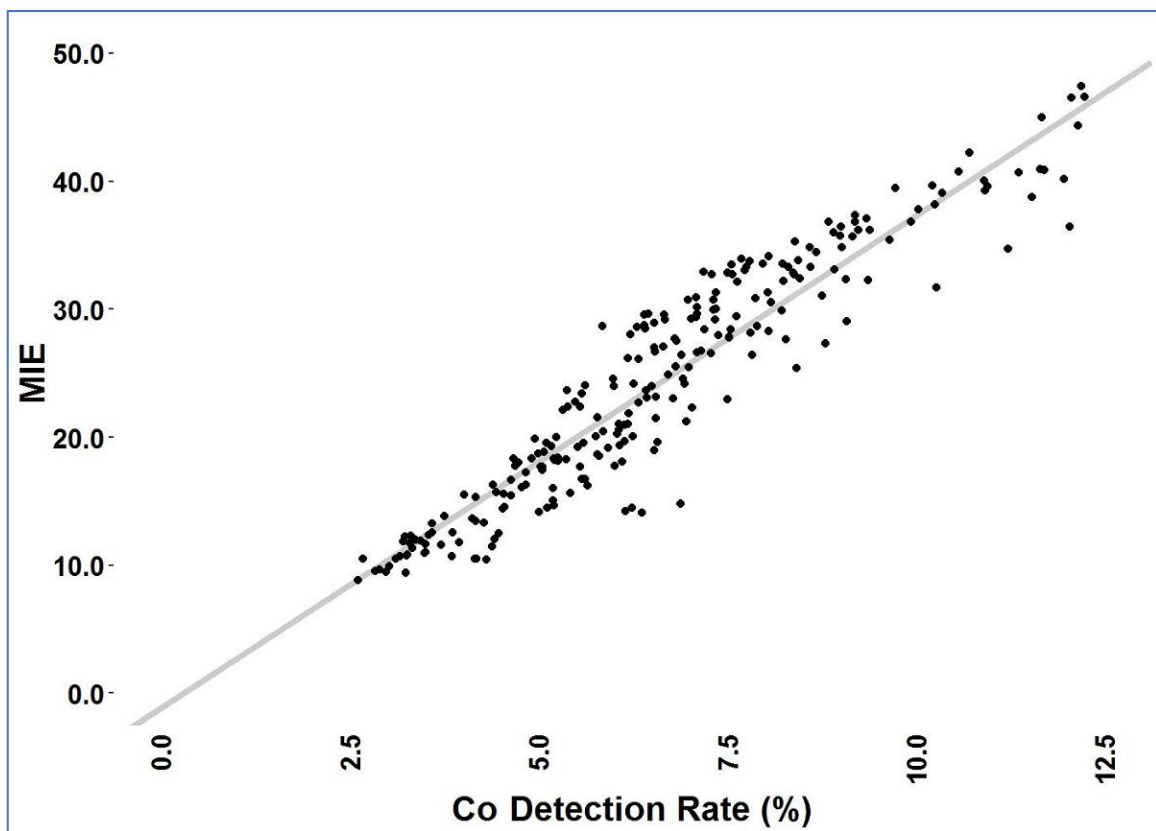

Supplement: publichealth_v4i3e59_app7.pdf [file publichealth_v4i3e59_app7.pdf]
